# Supplementary material for: A new repository of electrical resistivity tomography and ground penetrating radar data from summer 2022 near Ny-Ålesund, Svalbard
Source: Copernicus journal article supplement (doi:10.5194/essd-2023-461), 2024-01-12
Supplement: Supplementary file [file essd-2023-461-RC1-supplement.pdf]

Some minor revisions to the manuscript from Pace et al. are listed here.

Line #43 Reformulate the sentence: From a geophysical point of view, the Svalbard archipelago is interesting because of the presence of permafrost with seasonal active layer, springs, etc.

Line #50 They can be easily distinguished by the different resistivity values.

Line #53 is based.

Line #54 it can (the whole sentence could be rephrased)

Line #56 "the permafrost has mainly been studied", I guess it means in the area? Or in general? Probably the "mainly" is confusing.

Line #75 Review: "from its glacial and periglacial systems".

Line #90 Because of the importance of the sentence, I suggest changing it to "The aim of the geophysical survey is to investigate the presence and role of groundwater flow across the active layer and through and beneath the permafrost".

Line #109 Delete "-".

Line #180 Several scientific instruments in Ny-Ålesund take advantage of the radio silence in Ny-Ålesund. An overview of both transmitting and receiving RF equipment used in Ny-Ålesund can be found in the NySMAC frequency list. It may be mentioned in the text.

Line #450 delete "the" before Ny-Ålesund
